# Supplementary material for: 3D printed reduced graphene oxide-GelMA hybrid hydrogel scaffolds for potential neuralized bone regeneration
Source: Royal Society of Chemistry journal article supplement (doi:10.1039/d2tb01979e), 2023-01-01
Supplement: d2tb01979e1.pdf [file d2tb01979e1.pdf]

## Supporting Information

### 3D printed reduced graphene oxide-GelMA hybrid hydrogel scaffolds for potential neuralized bone regeneration

*Xinwei Zhang,<sup>ab</sup> Hao Zhang,<sup>ab</sup> Yi Zhang,<sup>ab</sup> Huimin Huangfu,<sup>ab</sup> Yixin Yang,  
<sup>ab</sup> Qiuyue Qin,<sup>ab</sup> Yidi Zhang<sup>\*ab</sup> and Yanmin Zhou<sup>\*ab</sup>*

\* Corresponding authors

<sup>a</sup> Hospital of Stomatology, Jilin University, Changchun 130000,  
China

<sup>b</sup> Jilin Provincial Key Laboratory of Tooth Development and Bone  
Remodeling, Jilin University, Changchun 130000, China

E-mail: zhangyidi@jlu.edu.cn(Yidi Zhang) ;

zhouym@jlu.edu.cn(Yanmin Zhou)

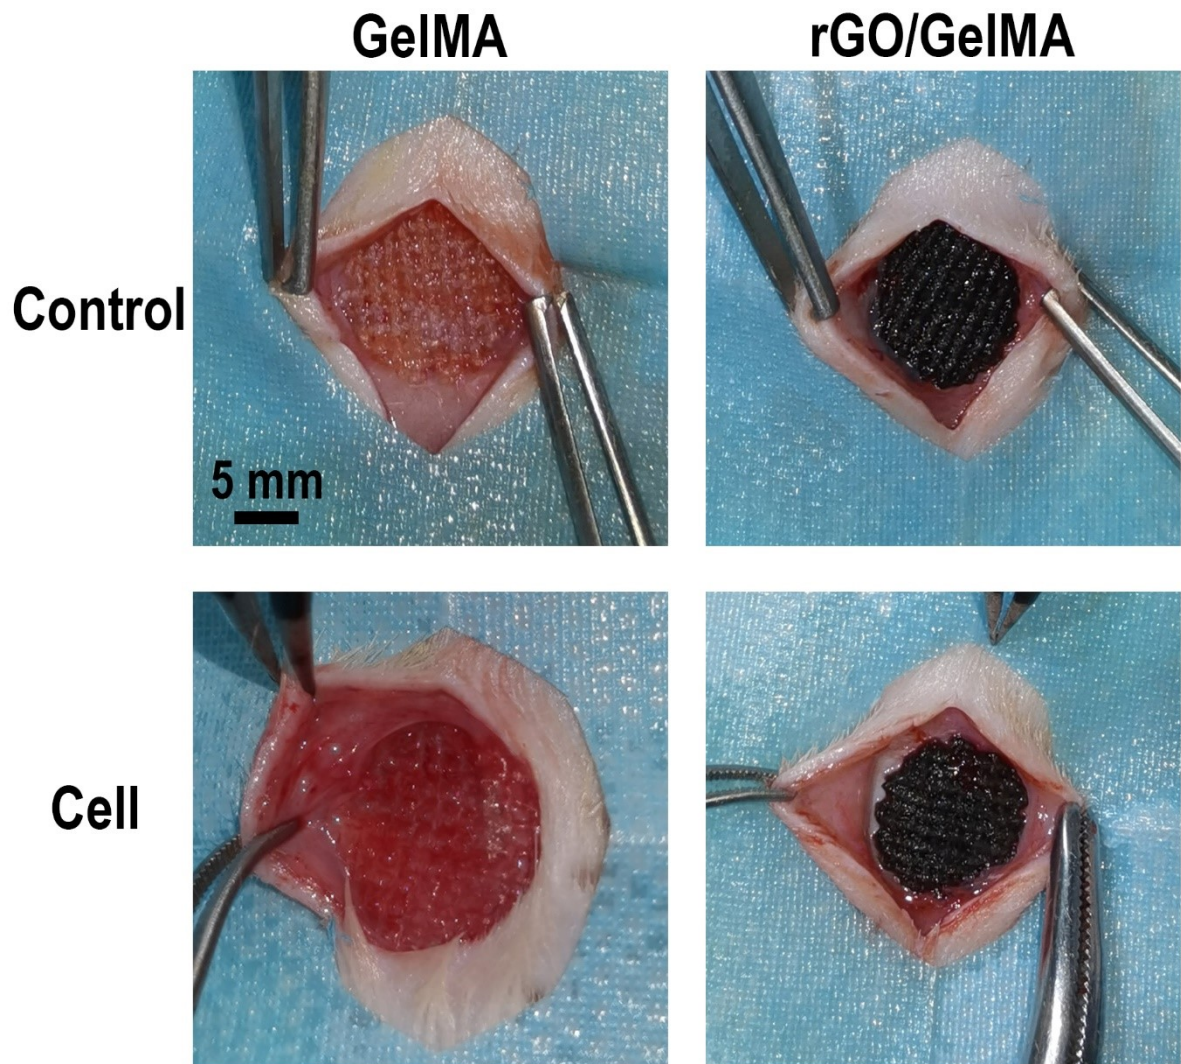

**Figure. S1** Photographs of the rat subcutaneous transplantation model.

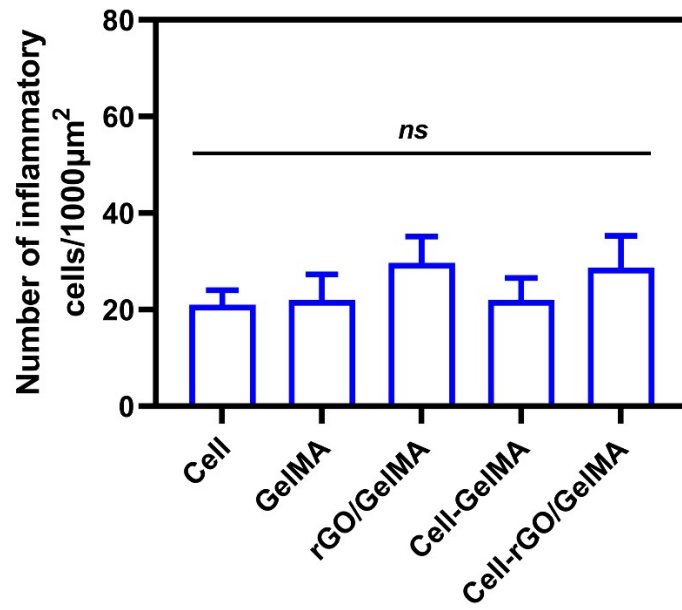

**Figure. S2** The number of inflammatory cells in the tissue sections of each group ( $n=3$ ,  $ns$  = not significant).

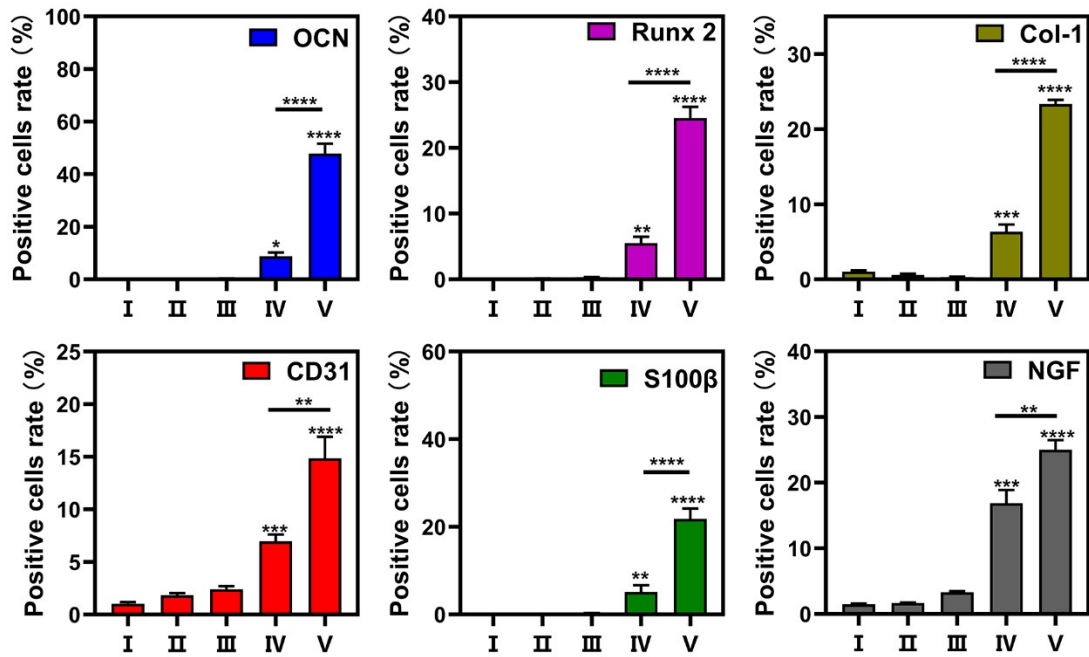

**Figure. S3** Statistical charts of immunohistochemistry and immunofluorescence positive cells in each group 8 weeks after operation.  $p < 0.05$  indicates a significant difference ( $n=3$ ,  $*p < 0.05$ ,  $**p < 0.01$ ,  $***p < 0.001$ ,  $****p < 0.0001$ ,  $ns$  = not significant).



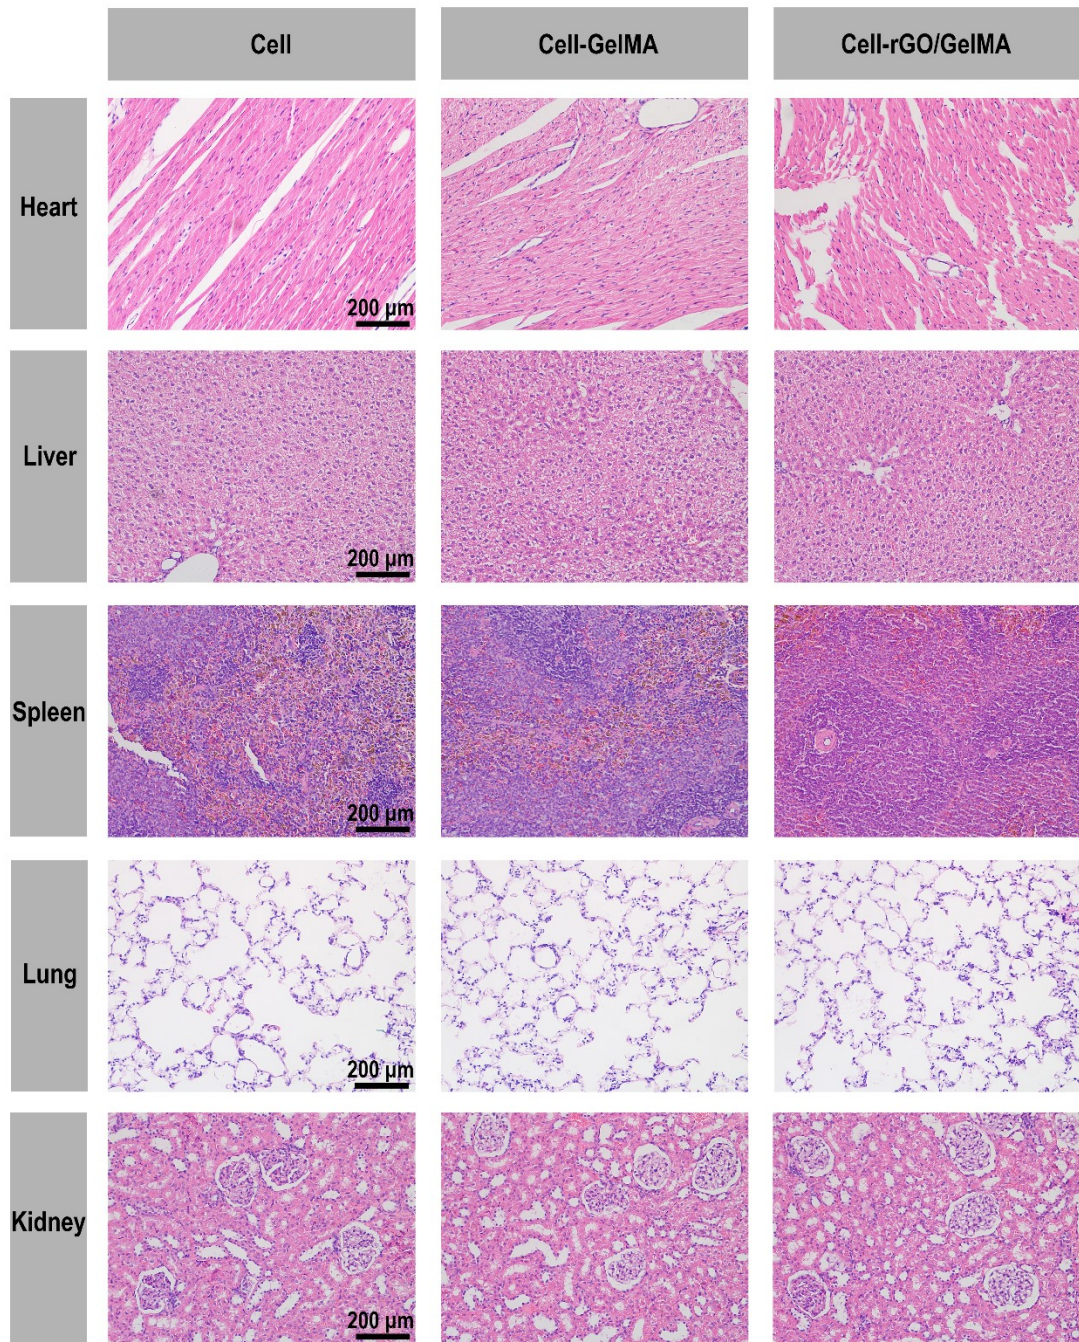

**Figure. S4** H&E staining of heart, liver, spleen, lung and kidney of experimental animals in each group at 8 weeks after operation.

**Table S1.** Primer sequences of the genes for qRT-PCR analysis.

| Primers | Forward sequence<br>(5'-3') |                     | Reverse sequence<br>(5'-3') |                      |
|---------|-----------------------------|---------------------|-----------------------------|----------------------|
|         | NGF                         | TGATCGGCGTACAGGCAGA |                             | GAGGGCTGTGTCAAGGGAAT |
| PMP22   | TGTACCACATCCGCCTTGG         |                     | GAGCTGGCAGAAGAACAGGAAC      |                      |
| NCAM    | TTCAGTGACGACAGTTCGGAGC      |                     | TGCGAAGACCTTGAGGTGGAT       |                      |
| Krox20  | TTTTTCCATCTCCGTGCCA         |                     | GAACGGCTTTCGATCAGGG         |                      |
| RUNX2   | CATGGCCGGGAATGATGAG         |                     | TGTGAAGACCGTTATGGTCAAAGTG   |                      |
| OCN     | AAGCAGGAGGGCAATAAGGT        |                     | CCGTAGATGCGTTTGTAGGC        |                      |
| ALP     | CATCGCCTATCAGCTAATGCACA     |                     | ATGAGGTCCAGGCCATCCAG        |                      |
| Col-1   | GACATGTTTCAGCTTTGTGGACCTC   |                     | AGGGACCCTTAGGCCATTGTGTA     |                      |
| GAPDH   | AGGTCGGTGTGAACGGATTTG       |                     | TGTAGACCATGTAGTTGAGGTCA     |                      |

**Table S2.** Specific values of each group of compression strain tests.

| Groups    | Limiting Stress (kPa) |                 | Limiting Strain (%) |                 | Compressive modulus (kPa) |                 |
|-----------|-----------------------|-----------------|---------------------|-----------------|---------------------------|-----------------|
|           | Mean $\pm$ SD         | <i>p</i> Value  | Mean $\pm$ SD       | <i>p</i> Value  | Mean $\pm$ SD             | <i>p</i> Value  |
| GelMA     | 90.52 $\pm$ 8.94      |                 | 63.33 $\pm$ 5.14    |                 | 29.33 $\pm$ 0.91          |                 |
| 0.03rGO/G | 125.90 $\pm$ 9.29     | <i>p</i> > 0.05 | 73.33 $\pm$ 4.71    | <i>p</i> > 0.05 | 32.40 $\pm$ 1.64          | <i>p</i> > 0.05 |
| 0.05rGO/G | 174.26 $\pm$ 23.78    | <i>p</i> < 0.05 | 79.17 $\pm$ 1.18    | <i>p</i> < 0.05 | 34.87 $\pm$ 2.19          | <i>p</i> < 0.05 |
| 0.1rGO/G  | 51.01 $\pm$ 7.95      | <i>p</i> > 0.05 | 70.67 $\pm$ 4.92    | <i>p</i> > 0.05 | 15.27 $\pm$ 1.84          | <i>p</i> < 0.05 |

**Table S3.** Specific values of storage modulus under 405 nm illumination for 60 seconds.

| <b>Groups</b>    | <b>Mean <math>\pm</math> SD</b> | <b><i>p</i> Value</b> |
|------------------|---------------------------------|-----------------------|
| GelMA            | 12.40 $\pm$ 0.46                |                       |
| <b>0.03rGO/G</b> | 16.75 $\pm$ 1.49                | <i>p</i> > 0.05       |
| <b>0.05rGO/G</b> | 22.49 $\pm$ 5.49                | <i>p</i> < 0.05       |
| <b>0.1rGO/G</b>  | 8.96 $\pm$ 2.42                 | <i>p</i> > 0.05       |
